# Supplementary material for: Local Delivery of Taxol From FGL-Functionalized Self-Assembling Peptide Nanofiber Scaffold Promotes Recovery After Spinal Cord Injury
Source: PubMed Central journal article supplement (PMC7471253; doi:10.3389/fcell.2020.00820), 2020-08-21
Supplement: Data_Sheet_1.pdf [file Data_Sheet_1.pdf]

## Supplementary Material

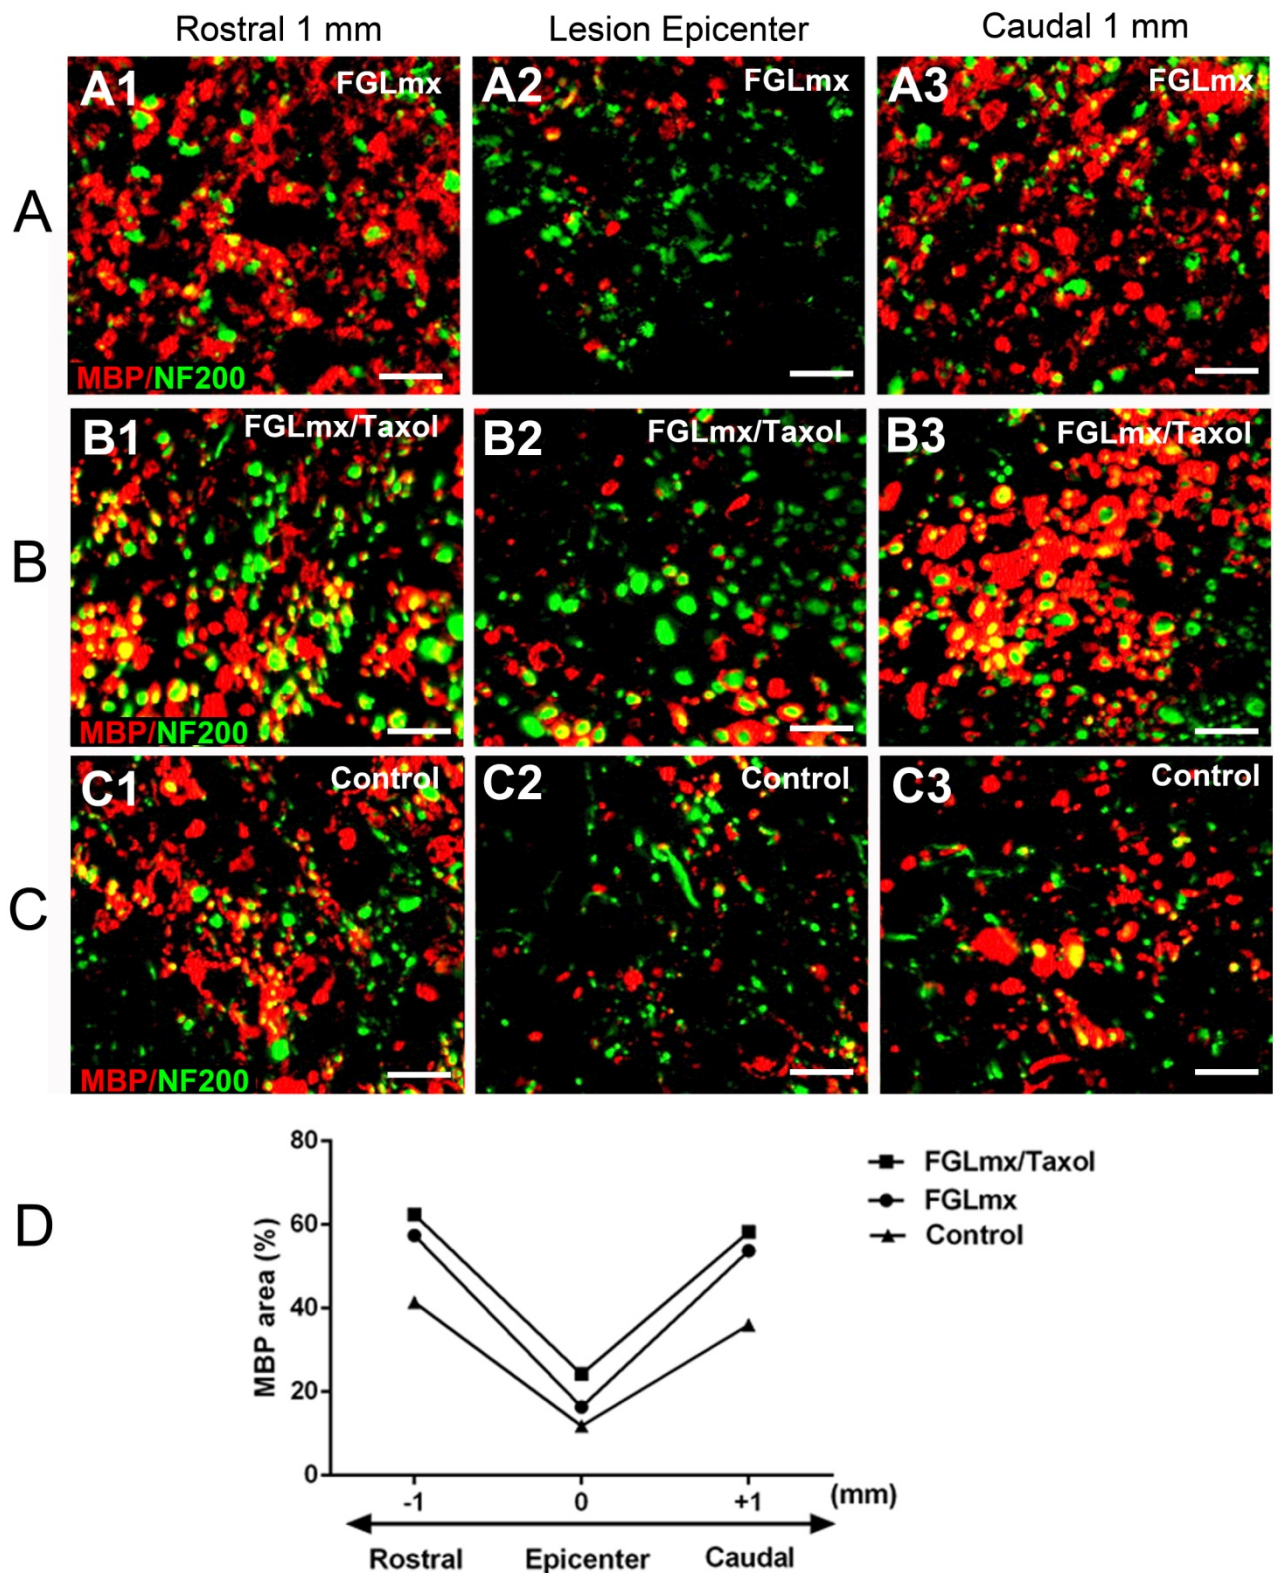

**FIGURE S1** | Remyelination of dorsal column axons at the lesion site is frequently associated with oligodendrocytes. Costaining for axons (NF200; green) and myelin (MBP; red) illustrating remyelinating oligodendrocytes in the dorsal column of the spinal cord at the lesion site at 8 weeks after injury. (A) FGLmx-treated group. (B) FGLmx/Taxol-treated group. (C) Control group. The scale bars are 25  $\mu$ m. (D) Quantification of dorsal column axons with remyelination in serial sections of 2-mm spinal cord segments incorporating the injury epicenter. The x-axis refers to the distance from the injury epicenter.

## VIDEO S2 | Behavioral Assessments.

| <b>Time</b>          | <b>Video</b> | <b>Groups</b> | <b>The Average BBB Score</b> | <b>Neurobehavioral Features</b>                                                                                                                                                                                                |
|----------------------|--------------|---------------|------------------------------|--------------------------------------------------------------------------------------------------------------------------------------------------------------------------------------------------------------------------------|
| The day after injury | Video 1      | FGLmx         | 0                            | No observable hindlimb (HL) movements were observed                                                                                                                                                                            |
|                      | Video 2      | FGLmx/Taxol   | 0                            |                                                                                                                                                                                                                                |
|                      | Video 3      | Control       | 0                            |                                                                                                                                                                                                                                |
| 2 weeks after injury | Video 4      | Control       | 7                            | Extensive movement of all three HL joints was observed                                                                                                                                                                         |
|                      | Video 5      | FGLmx         | 9                            | Plantar placement with weight support in stance only or consistent weight supported dorsal stepping and no plantar stepping was observed                                                                                       |
|                      | Video 6      | FGLmx/Taxol   | 11                           | Frequent to consistent weight-supported steps and no forelimb-hindlimb coordination was observed                                                                                                                               |
| 8 weeks after injury | Video 7      | Control       | 9                            | Plantar placement with weight support in stance only or frequent weight supported dorsal stepping and no plantar stepping was observed                                                                                         |
|                      | Video 8      | FGLmx         | 11                           | Frequent to consistent weight-supported steps and no forelimb-hindlimb coordination was observed                                                                                                                               |
|                      | Video 9      | FGLmx/Taxol   | 14                           | Consistent coordinated plantar stepping, predominant paw position is rotated at initial contact and liftoff; Frequent plantar stepping, consistent forelimb-hindlimb coordination, and occasional dorsal stepping was observed |

**TABLE S3 | The BBB Scale (Basso et al., 1996).**

| <b>Score</b> | <b>Characteristics</b>                                                                                                                                                                                | <b>Comment</b>                                                                                                                                                                                    |
|--------------|-------------------------------------------------------------------------------------------------------------------------------------------------------------------------------------------------------|---------------------------------------------------------------------------------------------------------------------------------------------------------------------------------------------------|
| 0            | No observable hindlimb (HL) movements                                                                                                                                                                 |                                                                                                                                                                                                   |
| 1            | Slight movement of one or two HL joints                                                                                                                                                               | Slight = $\leq 50\%$ of joint range                                                                                                                                                               |
| 2            | Extensive movement of one HL joint and possible slight movement of one other joint                                                                                                                    | Extensive = $> 50\%$ of joint range                                                                                                                                                               |
| 3            | Extensive movement of two HL joints                                                                                                                                                                   | Two joints = usually hip and knee                                                                                                                                                                 |
| 4            | Slight movement of all three HL joints                                                                                                                                                                | Three joints = usually hip, knee and ankle                                                                                                                                                        |
| 5            | Slight movement of two HL joints and extensive movement of HL third joint                                                                                                                             |                                                                                                                                                                                                   |
| 6            | Extensive movement of two HL joints, slight movement of third HL joint                                                                                                                                | Third joint = usually the ankle                                                                                                                                                                   |
| 7            | Extensive movement of all three HL joints                                                                                                                                                             |                                                                                                                                                                                                   |
| 8            | Sweeping with no weight support or Plantar placement with no weight support                                                                                                                           | Sweeping = rhythmic extensions of three HL joints, rat on side                                                                                                                                    |
| 9            | Plantar placement with weight support in stance only or Occasional, frequent or consistent weight supported dorsal stepping and no plantar stepping                                                   | Weight support = contraction of HL extensor muscle during plantar placement of paw or elevation of hindquarters in stance only                                                                    |
| 10           | Occasional weight-supported steps with no forelimb-hindlimb (FL-HL) coordination                                                                                                                      | Occasional = $>5\%$ and $\leq 50\%$ ;<br>Steps = plantar contact with weight support, HL advances to reestablish plantar contact;<br>Coordination = one HL step per FL step, alternating HL steps |
| 11           | Frequent to consistent weight-supported steps and no FL-HL coordination                                                                                                                               | Frequent = 51- 94% of the time;<br>Consistent = 95 - 100% of time                                                                                                                                 |
| 12           | Frequent to consistent weight-supported steps and occasional FL-HL coordination                                                                                                                       | 6-50% bouts of coordinated locomotion                                                                                                                                                             |
| 13           | Frequent to consistent weight-supported steps and frequent FL-HL coordination                                                                                                                         | 51-95% bouts of coordinated locomotion                                                                                                                                                            |
| 14           | Consistent coordinated plantar stepping, predominant paw position is rotated at initial contact and liftoff; Frequent plantar stepping, consistent FL-HL coordination, and occasional dorsal stepping | Rotated = internal or external rotation of the hind paw when placed or at liftoff                                                                                                                 |
| 15           | Consistent coordinated plantar stepping, no or occasional toe clearance during forward limb advancement, predominant paw position is parallel at initial contact                                      | Parallel = hind paw placement parallel to body on initial contact or liftoff;<br>Toe clearance = listen for toe drag sounds, i.e., footsteps without toe drag sound                               |
| 16           | Consistent coordinated plantar stepping, frequent toe clearance, and predominant paw position is parallel at initial contact and rotated at lift-off                                                  | Frequent toe clearance = more than half of footsteps have no toe drag sounds                                                                                                                      |
| 17           | Consistent coordinated plantar stepping, frequent toe clearance, predominant paw position is parallel at initial contact and lift-off                                                                 |                                                                                                                                                                                                   |
| 18           | Consistent coordinated plantar stepping, consistent toe clearance, predominant paw position is parallel at                                                                                            | Consistent toe clearance = $\leq 4$ toe drag sounds during the 4-min observation period                                                                                                           |

|    |                                                                                                                                                                                   |                                                                                                                                 |
|----|-----------------------------------------------------------------------------------------------------------------------------------------------------------------------------------|---------------------------------------------------------------------------------------------------------------------------------|
|    | initial contact and lift-off                                                                                                                                                      |                                                                                                                                 |
| 19 | Consistent coordinated plantar stepping, consistent toe clearance, predominant paw position parallel at initial contact and lift-off, tail is down part or all the time           | Tail down = tail touches ground during stepping                                                                                 |
| 20 | Consistent coordinated plantar stepping, consistent toe clearance, predominant paw position parallel at initial contact and lift-off, tail consistently up, and trunk instability | Tail up = does not touch ground;<br>Trunk instability = lateral weight shifts when turning quickly, waddling, lurching, falling |
| 21 | Consistent coordinated gait, consistent toe clearance, predominant paw position is parallel at initial contact and lift-off, tail consistently up, and consistent trunk stability | Consistent trunk stability: no lurching or falling; pelvic girdle and tail in line with locomotion                              |

Basso, D. M., Beattie, M. S., Bresnahan, J. C., Anderson, D. K., Faden, A. I., Gruner, J. A., et al. (1996). MASCIS evaluation of open field locomotor scores: effects of experience and teamwork on reliability. Multicenter Animal Spinal Cord Injury Study. *J Neurotrauma*, 13(7), 343-359. doi: 10.1089/neu.1996.13.343
